# Supplementary material
Source: PubMed Central journal article supplement (PMC3626558)

**Supplemental Figure 1.** Comparative abilities of pseudovirions and soluble Env proteins to trigger, or block, a  $\text{Ca}^{++}$  flux. **(A)** Comparison of the response triggered by soluble trimer to pseudovirions. Note that this high titer preparation of virions was antigenically matched, except for the  $\Delta\text{CT}$  mutation, which promotes an abnormally high level density of Env spikes. Final concentration of pseudovirus infectious particles was  $3 \times 10^9/\text{ml}$ . **(B)** Analysis of the ability of gp120 monomers to suppress response to trimers. **(C)** Analysis of the ability of pseudovirions to suppress the soluble trimer response.

**Supplemental Figure 2.** Flow cytometry analysis of bNAb BCR expression in WEHI231 and K46 B cell lines. **(A)** Analysis of the expression in K46 cells of H and L chains of the indicated bNAbs was assessed one day after induction by staining with anti-human L-chain or anti-IgM reagents. **(B)** Evaluation of bNAb expression levels in transduced WEHI231 cells. Cells were gated after induction for a minimal level over background of upregulation of the transduced L-chain and then assessed for the correlation between light chain expression level and the binding to YU2 trimer. **(C)** Analysis of K46 transductants analyzed in part A for the correlation between cell surface levels of transduced H and L chains.

# Supplemental Figure 1

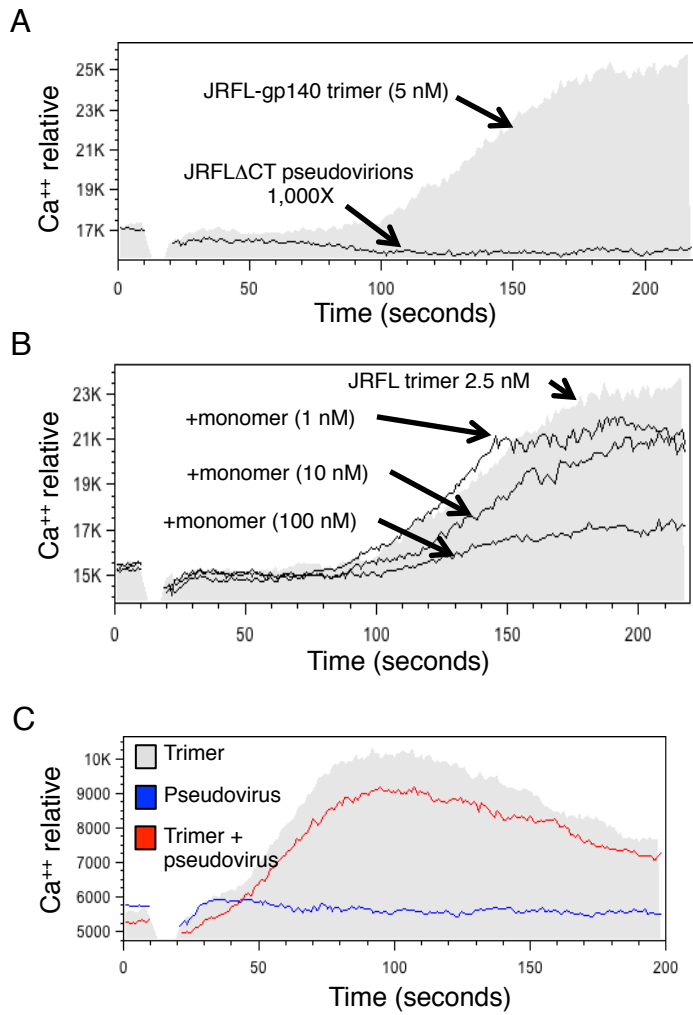

# Supplemental Figure 2

**A**

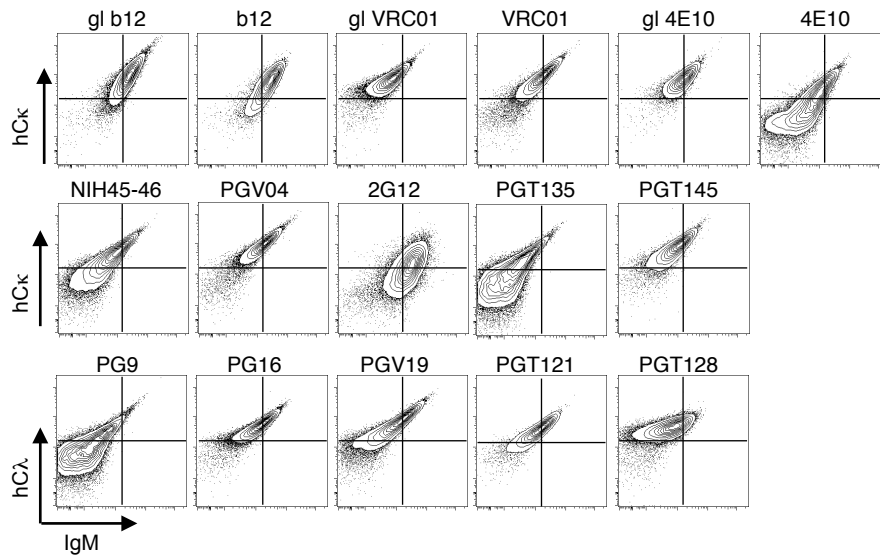

**B**

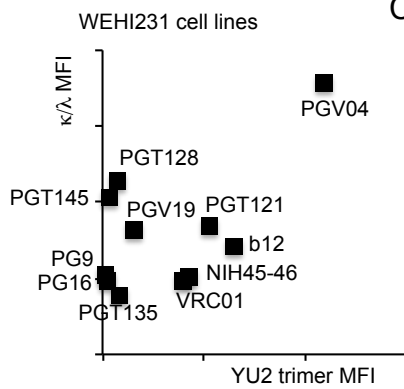

**C**

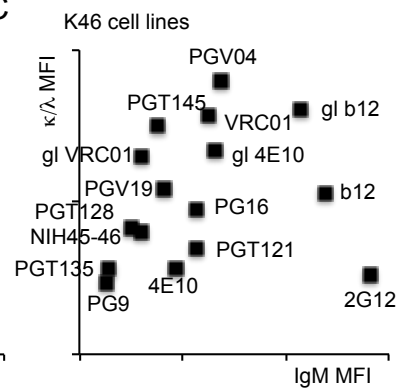

Supplement: NIHMS409384-supplement-1.pdf [file NIHMS409384-supplement-1.pdf]
